# Supplementary material
Source: PubMed Central journal article supplement (PMC9110212)
Supplement: 204_2022_3302_MOESM1_ESM.pdf [file 204_2022_3302_MOESM1_ESM.pdf]

**Supplementary Table 1: Treatment Groups**

|                  |                            | Test Material     | Dose                     | Route & Frequency                                                    | Study Duration post Last Dosing Session |                                 |
|------------------|----------------------------|-------------------|--------------------------|----------------------------------------------------------------------|-----------------------------------------|---------------------------------|
|                  |                            |                   |                          |                                                                      | 3 Days Main Phase (Day 31)              | 3 weeks Recovery Phase (Day 49) |
| Treatment groups | <i>n=20</i><br>(10♂ & 10♀) | Vehicle Control   | 0                        | 3 Repeated IM injections at an interval of 2 weeks (Days 0, 14 & 28) | <i>n=10</i><br>(5♂ & 5♀)                | <i>n=10</i><br>(5♂ & 5♀)        |
|                  | <i>n=20</i><br>(10♂ & 10♀) | Vaccine Low Dose  | 1×10 <sup>6</sup> PFU/ml |                                                                      | <i>n=10</i><br>(5♂ & 5♀)                | <i>n=10</i><br>(5♂ & 5♀)        |
|                  | <i>n=20</i><br>(10♂ & 10♀) | Vaccine High Dose | 1×10 <sup>7</sup> PFU/ml |                                                                      | <i>n=10</i><br>(5♂ & 5♀)                | <i>n=10</i><br>(5♂ & 5♀)        |

**Supplementary Table 2: Study outline and endpoints**

|                                    |  |                                                                                                                                                                                                                                                                                                                                                                                                                                                                                                                                                                                                                                                                                                                                                                                                                                                                                                                                                                                                                                                                                                                                                                                                                                                                                                                                                                                                                                                                                                                                                                                                                                                                                                                                                                                                                                                                                                                                     |
|------------------------------------|--|-------------------------------------------------------------------------------------------------------------------------------------------------------------------------------------------------------------------------------------------------------------------------------------------------------------------------------------------------------------------------------------------------------------------------------------------------------------------------------------------------------------------------------------------------------------------------------------------------------------------------------------------------------------------------------------------------------------------------------------------------------------------------------------------------------------------------------------------------------------------------------------------------------------------------------------------------------------------------------------------------------------------------------------------------------------------------------------------------------------------------------------------------------------------------------------------------------------------------------------------------------------------------------------------------------------------------------------------------------------------------------------------------------------------------------------------------------------------------------------------------------------------------------------------------------------------------------------------------------------------------------------------------------------------------------------------------------------------------------------------------------------------------------------------------------------------------------------------------------------------------------------------------------------------------------------|
| <p><b>In-Life Examination:</b></p> |  | <p><b>Clinical examination:</b> morbidity and mortality (twice daily), clinical signs (once daily) detailed clinical examination (once weekly)<br/> <b>Local Reaction (Draize scoring):</b> 4-6 hours post dosing, 1 day post each dosing session and once weekly thereafter<br/> <b>Body Temperature:</b> at acclimation, 4-6 hours &amp; 1 day post each dosing session (in case an increase in body temperature were noted, additional measurements were carried)<br/> <b>Body Weight:</b> at acclimation, prior to each dosing session, 3 days post dosing and thereafter once weekly.<br/> <b>Food Consumption:</b> at acclimation, at dosing day, 3 days post dosing and thereafter once weekly. once weekly.<br/> <b>Ophthalmic Examinations:</b> at acclimation and prior to each scheduled sacrifice session.</p> <p><b>Blood Collection:</b></p> <ul style="list-style-type: none"> <li>• CRP – Determined prior to the first dosing session on day -1 (baseline) &amp; 3 and 7 days post each dosing session (i.e. Days 17, 21, 31 &amp; 35) in 5 males &amp; 5 females per group.</li> <li>• Immunogenicity – Determined on days -1 (baseline) &amp; 13, 27 (i.e. a day prior to the 2nd and 3rd dosing session) and 49 in 5 males &amp; 5 females per group.</li> <li>• Viremia – Determined on days 2 &amp; 7 and prior to each scheduled termination time point (Days 31 and 49) in 5 males &amp; 5 females per group.</li> <li>• Hematology, Biochemistry and Coagulation Parameters: Determined at baseline, Day 3 and prior to each scheduled termination time point (Days 31 and 49) .</li> </ul> <p><b>Urine Collection:</b></p> <ul style="list-style-type: none"> <li>• Urinalysis: Prior to each scheduled termination time point (Days 31 and 49) .</li> <li>• Viruria –Days 2 &amp; 7 and prior to each scheduled termination time point (Days 31 and 49) in 5 males &amp; 5 females per group.</li> </ul> |
| <p><b>Necropsy:</b></p>            |  | <p><b>Gross Pathology:</b> Full detailed macroscopic examination at each scheduled termination time point (Days 31 and 49)<br/> <b>Organ Weight:</b> Adrenals, Brain, Epididymides, Heart, Kidneys, Liver, Lungs, Ovaries, Pituitary, Spleen, Testes, Thymus, Thyroid and Uterus &amp; cervix.</p>                                                                                                                                                                                                                                                                                                                                                                                                                                                                                                                                                                                                                                                                                                                                                                                                                                                                                                                                                                                                                                                                                                                                                                                                                                                                                                                                                                                                                                                                                                                                                                                                                                  |
| <p><b>Biodistribution:</b></p>     |  | <p>Samples from the following tissues/organs was collected: Brain, Ovary/Testes, Liver, Thymus, Heart, Lung, Kidney, Spleen, Mesenteric lymph node, Iliac lymph node, Subcutaneous tissue at the injection site, Thigh muscle at the injection site (3 injection sites), Bone marrow (from femur)</p>                                                                                                                                                                                                                                                                                                                                                                                                                                                                                                                                                                                                                                                                                                                                                                                                                                                                                                                                                                                                                                                                                                                                                                                                                                                                                                                                                                                                                                                                                                                                                                                                                               |
| <p><b>Histopathology:</b></p>      |  | <p>Full histopathological examinations from the Main Phase animals (n=30 rabbits) was carried out by a board-certified pathologist.</p>                                                                                                                                                                                                                                                                                                                                                                                                                                                                                                                                                                                                                                                                                                                                                                                                                                                                                                                                                                                                                                                                                                                                                                                                                                                                                                                                                                                                                                                                                                                                                                                                                                                                                                                                                                                             |

**Supplementary Table 3: Mean Temperature Values**

| Dose level<br>(Sex)                        |             | Temperature (°C)<br>(Pre-Dosing) |                  |          |         |       |       |       |       |       |       |                  |       |       |       |
|--------------------------------------------|-------------|----------------------------------|------------------|----------|---------|-------|-------|-------|-------|-------|-------|------------------|-------|-------|-------|
|                                            |             | Acclimation<br>1                 | Acclimation<br>2 | 0        | 1       | 2     | 3     | 14    | 15    | 16    | 17    | 28 <sup>17</sup> | 29    | 30    | 31    |
| <b>0 - Control<br/>(Females)</b>           | <b>Mean</b> | 39.30                            | 39.09            | 39.23    | 39.16   | 39.07 | 38.96 | 40.18 | 39.18 | 39.27 | 39.17 | 39.45            | 39.29 | 39.24 | 39.29 |
|                                            | <b>SD</b>   | 0.114                            | 0.219            | 0.248    | 0.165   | 0.257 | 0.087 | 0.703 | 0.156 | 0.112 | 0.138 | 0.140            | 0.131 | 0.175 | 0.102 |
|                                            | <b>n</b>    | 10                               | 10               | 10       | 10      | 10    | 10    | 10    | 10    | 10    | 10    | 10               | 10    | 10    | 10    |
| <b>10<sup>6</sup> Pfu/ml<br/>(Females)</b> | <b>Mean</b> | 39.40                            | 39.11            | 39.52**↑ | 39.25   | 39.13 | 38.99 | 40.37 | 39.26 | 39.19 | 39.24 | 39.52            | 39.38 | 39.39 | 39.30 |
|                                            | <b>SD</b>   | 0.260                            | 0.127            | 0.193    | 0.175   | 0.322 | 0.267 | 0.591 | 0.254 | 0.207 | 0.120 | 0.231            | 0.174 | 0.200 | 0.223 |
|                                            | <b>n</b>    | 10                               | 10               | 10       | 10      | 10    | 10    | 10    | 10    | 10    | 10    | 10               | 10    | 10    | 10    |
| <b>10<sup>7</sup> Pfu/ml<br/>(Females)</b> | <b>Mean</b> | 39.34                            | 39.25            | 39.52**↑ | 39.28   | 39.19 | 38.93 | 40.03 | 39.34 | 39.24 | 39.18 | 39.46            | 39.32 | 39.30 | 39.28 |
|                                            | <b>SD</b>   | 0.287                            | 0.145            | 0.184    | 0.160   | 0.366 | 0.226 | 0.670 | 0.194 | 0.127 | 0.119 | 0.174            | 0.098 | 0.134 | 0.128 |
|                                            | <b>n</b>    | 10                               | 10               | 10       | 10      | 10    | 10    | 10    | 10    | 10    | 10    | 10               | 10    | 10    | 10    |
| <b>0 - Control<br/>(Males)</b>             | <b>Mean</b> | 39.11                            | 39.24            | 39.24    | 38.87   | 39.12 | 38.77 | 40.14 | 39.19 | 39.16 | 39.20 | 39.28            | 39.27 | 39.23 | 39.10 |
|                                            | <b>SD</b>   | 0.177                            | 0.241            | 0.203    | 0.167   | 0.230 | 0.134 | 0.567 | 0.170 | 0.186 | 0.260 | 0.248            | 0.137 | 0.088 | 0.122 |
|                                            | <b>n</b>    | 10                               | 10               | 10       | 10      | 10    | 10    | 10    | 10    | 10    | 10    | 10               | 10    | 10    | 10    |
| <b>10<sup>6</sup> Pfu/ml<br/>(Males)</b>   | <b>Mean</b> | 39.09                            | 39.21            | 39.30    | 39.06*↑ | 39.09 | 38.94 | 39.84 | 39.18 | 39.12 | 39.11 | 39.40            | 39.33 | 39.16 | 39.00 |
|                                            | <b>SD</b>   | 0.264                            | 0.163            | 0.180    | 0.142   | 0.175 | 0.121 | 0.647 | 0.150 | 0.198 | 0.139 | 0.317            | 0.081 | 0.125 | 0.143 |
|                                            | <b>n</b>    | 10                               | 10               | 10       | 10      | 10    | 10    | 10    | 10    | 10    | 10    | 10               | 10    | 10    | 10    |
| <b>10<sup>6</sup> Pfu/ml<br/>(Males)</b>   | <b>Mean</b> | 38.91                            | 39.27            | 39.32    | 38.98   | 39.11 | 38.90 | 39.71 | 39.13 | 39.19 | 39.04 | 39.36            | 39.29 | 39.17 | 39.06 |
|                                            | <b>SD</b>   | 0.172                            | 0.178            | 0.164    | 0.196   | 0.131 | 0.241 | 0.639 | 0.107 | 0.247 | 0.316 | 0.276            | 0.120 | 0.183 | 0.087 |
|                                            | <b>n</b>    | 10                               | 10               | 10       | 10      | 10    | 10    | 10    | 10    | 10    | 10    | 10               | 10    | 10    | 10    |

\*p<0.05 Vs. Control, \*\* p<0.01 Vs. Control; (multiple comparisons test); ↓: Decrease ↑: Increase

**Supplementary Table 4: Biodistribution of rVSV-ΔG-SARS-CoV-2-S Vaccine**  
qPCR Ct values and calculated Vaccine amounts (PFU) in each tissue sample

| <b>Lung</b>                |                 | N (Ct - Av.) | N (Ct - STD) | S (Ct - Av.) | S (Ct - STD) | HPRT (Ct - Av.) | HPRT (Ct - STD) | <b>Vaccine amount (PFU) - N</b> | <b>Vaccine amount (PFU) - S</b> |
|----------------------------|-----------------|--------------|--------------|--------------|--------------|-----------------|-----------------|---------------------------------|---------------------------------|
| #                          | Sample          |              |              |              |              |                 |                 |                                 |                                 |
| <b>1M - Control main</b>   |                 |              |              |              |              |                 |                 |                                 |                                 |
| <b>1</b>                   | <b>3447 4.1</b> | 36.51        | 0.01         | 41.84        | 0.71         | 26.15           | 0.37            | <b>NA</b>                       | <b>NA</b>                       |
| <b>2</b>                   | <b>3473 4.1</b> | 37.61        | 0.81         | ND           | NA           | 27.37           | 0.21            | <b>NA</b>                       | <b>NA</b>                       |
| <b>3</b>                   | <b>3511 4.1</b> | ND           | NA           | 41.02        | 0.81         | 27.88           | 0.47            | <b>NA</b>                       | <b>NA</b>                       |
| <b>1F - Control main</b>   |                 |              |              |              |              |                 |                 |                                 |                                 |
| <b>4</b>                   | <b>3470 4.1</b> | 36.74        | 0.03         | ND           | NA           | 26.76           | 0.10            | <b>NA</b>                       | <b>NA</b>                       |
| <b>5</b>                   | <b>3395 4.1</b> | 37.23        | 0.22         | ND           | NA           | 26.83           | 0.44            | <b>NA</b>                       | <b>NA</b>                       |
| <b>6</b>                   | <b>3489 4.1</b> | ND           | NA           | ND           | NA           | 26.90           | 0.37            | <b>NA</b>                       | <b>NA</b>                       |
| <b>3M - High dose main</b> |                 |              |              |              |              |                 |                 |                                 |                                 |
| <b>7*</b>                  | <b>3485 4.1</b> | ND           | NA           | ND           | NA           | ND              | NA              | <b>NA</b>                       | <b>NA</b>                       |
| <b>8</b>                   | <b>3486 4.1</b> | 36.62        | 1.23         | ND           | NA           | 27.88           | 0.35            | <b>NA</b>                       | <b>NA</b>                       |
| <b>9</b>                   | <b>3531 4.1</b> | 36.875       | 0.05         | ND           | NA           | 29.89           | 1.87            | <b>NA</b>                       | <b>NA</b>                       |
| <b>3F - High dose main</b> |                 |              |              |              |              |                 |                 |                                 |                                 |
| <b>10</b>                  | <b>3483 4.1</b> | 36.905       | 2.65         | 41.33        | 1.62         | 27.06           | 0.66            | <b>NA</b>                       | <b>NA</b>                       |
| <b>11</b>                  | <b>3490 4.1</b> | ND           | NA           | ND           | NA           | 28.80           | 1.47            | <b>NA</b>                       | <b>NA</b>                       |
| <b>12</b>                  | <b>3379 4.1</b> | 36.675       | 0.45         | ND           | NA           | 26.70           | 0.47            | <b>NA</b>                       | <b>NA</b>                       |

| Skin & subcutaneous tissue |           | N (Ct - Av.) | N (Ct - STD) | S (Ct - Av.) | S (Ct - STD) | HPRT (Ct - Av.) | HPRT (Ct - STD) | Vaccine amount (PFU) - N | Vaccine amount (PFU) - S |
|----------------------------|-----------|--------------|--------------|--------------|--------------|-----------------|-----------------|--------------------------|--------------------------|
| #                          | Sample    |              |              |              |              |                 |                 |                          |                          |
| <b>1M - Control main</b>   |           |              |              |              |              |                 |                 |                          |                          |
| 14                         | 3447 11.1 | ND           | NA           | 40.82        | 1.01         | 28.33           | 0.06            | NA                       | NA                       |
| 13                         | 3473 11.1 | ND           | NA           | 42.16        | 0.68         | 27.42           | 0.19            | NA                       | NA                       |
| 15                         | 3511 11.1 | ND           | NA           | 41.08        | 0.65         | 29.06           | 0.23            | NA                       | NA                       |
| <b>1F - Control main</b>   |           |              |              |              |              |                 |                 |                          |                          |
| 16                         | 3470 11.1 | ND           | NA           | ND           | NA           | 24.97           | 0.23            | NA                       | NA                       |
| 17                         | 3395 11.1 | 37.91        | 1.27         | ND           | NA           | 28.19           | 0.13            | NA                       | NA                       |
| 18                         | 3489 11.1 | 36.65        | 0.93         | ND           | NA           | 25.19           | 0.01            | NA                       | NA                       |
| <b>3M - High dose main</b> |           |              |              |              |              |                 |                 |                          |                          |
| 19                         | 3485 11.1 | ND           | NA           | ND           | NA           | 27.27           | 0.08            | NA                       | NA                       |
| 20                         | 3486 11.1 | ND           | NA           | ND           | NA           | 26.73           | 0.32            | NA                       | NA                       |
| 21**                       | 3531 11.1 | ND           | NA           | ND           | NA           | ND              | NA              | NA                       | NA                       |
| <b>3F - High dose main</b> |           |              |              |              |              |                 |                 |                          |                          |
| 22                         | 3483 11.1 | ND           | NA           | ND           | NA           | 27.65           | 0.35            | NA                       | NA                       |
| 23                         | 3490 11.1 | ND           | NA           | ND           | NA           | 29.72           | 0.21            | NA                       | NA                       |
| 24                         | 3379 11.1 | 37.22        | 1.41         | 41.1         | 0            | 29.61           | 0.45            | NA                       | NA                       |

| <b>Colon</b>        |                  | <b>N (Ct - Av.)</b> | <b>N (Ct - STD)</b> | <b>S (Ct - Av.)</b> | <b>S (Ct - STD)</b> | <b>HPRT (Ct - Av.)</b> | <b>HPRT (Ct - STD)</b> | <b>Vaccine amount (PFU) - N</b> | <b>Vaccine amount (PFU) - S</b> |
|---------------------|------------------|---------------------|---------------------|---------------------|---------------------|------------------------|------------------------|---------------------------------|---------------------------------|
| <b>#</b>            | <b>Sample</b>    |                     |                     |                     |                     |                        |                        |                                 |                                 |
| 1M - Control main   |                  |                     |                     |                     |                     |                        |                        |                                 |                                 |
| <b>35</b>           | <b>3447.13.1</b> | ND                  | NA                  | ND                  | NA                  | 26.22                  | 0.06                   | <b>NA</b>                       | <b>NA</b>                       |
| <b>34</b>           | <b>3473.13.1</b> | ND                  | NA                  | ND                  | NA                  | 31.54                  | 0.20                   | <b>NA</b>                       | <b>NA</b>                       |
| <b>36</b>           | <b>3511.13.1</b> | 37.11               | 0.06                | ND                  | NA                  | 25.52                  | 0.15                   | <b>NA</b>                       | <b>NA</b>                       |
| 1F - Control main   |                  |                     |                     |                     |                     |                        |                        |                                 |                                 |
| <b>28</b>           | <b>3470.13.1</b> | 36.3                | 0.40                | ND                  | NA                  | 26.17                  | 0.18                   | <b>NA</b>                       | <b>NA</b>                       |
| <b>25</b>           | <b>3395.13.1</b> | ND                  | NA                  | ND                  | NA                  | 30.84                  | 0.33                   | <b>NA</b>                       | <b>NA</b>                       |
| <b>26</b>           | <b>3489.13.1</b> | ND                  | NA                  | ND                  | NA                  | 26.47                  | 0.13                   | <b>NA</b>                       | <b>NA</b>                       |
| 3M - High dose main |                  |                     |                     |                     |                     |                        |                        |                                 |                                 |
| <b>32</b>           | <b>3485.13.1</b> | ND                  | NA                  | ND                  | NA                  | 27.18                  | 0.14                   | <b>NA</b>                       | <b>NA</b>                       |
| <b>30</b>           | <b>3486.13.1</b> | ND                  | NA                  | 40.98               | 1.54                | 27.13                  | 0.16                   | <b>NA</b>                       | <b>NA</b>                       |
| <b>29</b>           | <b>3531.13.1</b> | 36.95               | 0.11                | ND                  | NA                  | 26.03                  | 0.11                   | <b>NA</b>                       | <b>NA</b>                       |
| 3F - High dose main |                  |                     |                     |                     |                     |                        |                        |                                 |                                 |
| <b>33</b>           | <b>3483.13.1</b> | ND                  | NA                  | ND                  | NA                  | 27.37                  | 0.62                   | <b>NA</b>                       | <b>NA</b>                       |
| <b>27</b>           | <b>3490.13.1</b> | ND                  | NA                  | 40.79               | 0.78                | 26.39                  | 0.05                   | <b>NA</b>                       | <b>NA</b>                       |
| <b>31</b>           | <b>3379.13.1</b> | ND                  | NA                  | ND                  | NA                  | 27.47                  | 0.26                   | <b>NA</b>                       | <b>NA</b>                       |



|                            |               |       |      |       |      |       |      |     |    |
|----------------------------|---------------|-------|------|-------|------|-------|------|-----|----|
| 2                          | 3447 14.1.2.1 | 36.86 | 0.63 | ND    | NA   | 27.87 | 0.08 | NA  | NA |
| 5                          | 3473 14.1.2.1 | ND    | NA   | ND    | NA   | 27.71 | 0.15 | NA  | NA |
| 8***                       | 3511 14.1.2.1 | 34.93 | 1.00 | 40.29 | 0.06 | 25.99 | 0.16 | <10 | NA |
| <b>1F - Control main</b>   |               |       |      |       |      |       |      |     |    |
| 11                         | 3470 14.1.2.1 | ND    | NA   | ND    | NA   | 28.66 | 0.06 | NA  | NA |
| 14                         | 3395 14.1.2.1 | ND    | NA   | ND    | NA   | 27.85 | 0.22 | NA  | NA |
| 17                         | 3489 14.1.2.1 | ND    | NA   | ND    | NA   | 28.11 | 0.20 | NA  | NA |
| <b>3M - High dose main</b> |               |       |      |       |      |       |      |     |    |
| 20                         | 3485 14.1.2.1 | ND    | NA   | ND    | NA   | 27.81 | 0.37 | NA  | NA |
| 23                         | 3486 14.1.2.1 | 36.37 | 0.55 | ND    | NA   | 28.45 | 0.05 | NA  | NA |
| 26                         | 3531 14.1.2.1 | ND    | NA   | ND    | NA   | 29.94 | 0.35 | NA  | NA |
| <b>3F - High dose main</b> |               |       |      |       |      |       |      |     |    |
| 29                         | 3483 14.1.2.1 | ND    | NA   | ND    | NA   | 30.90 | 0.03 | NA  | NA |
| 32                         | 3490 14.1.2.1 | ND    | NA   | ND    | NA   | 30.00 | 0.25 | NA  | NA |
| 35                         | 3379 14.1.2.1 | 35.15 | 0.10 | 41.14 | 0.71 | 26.10 | 0.08 | <10 | NA |



| Thigh muscle 3 pieces<br>- P,M,D |               | N (Ct -<br>Av.) | N (Ct -<br>STD) | S (Ct -<br>Av.) | S (Ct -<br>STD) | HPRT<br>(Ct - Av.) | HPRT<br>(Ct -<br>STD) | Vaccine<br>amount<br>(PFU) -<br>N | Vaccine<br>amount<br>(PFU) -<br>S |
|----------------------------------|---------------|-----------------|-----------------|-----------------|-----------------|--------------------|-----------------------|-----------------------------------|-----------------------------------|
| #                                | Sample        |                 |                 |                 |                 |                    |                       |                                   |                                   |
| 1M - Control main                |               |                 |                 |                 |                 |                    |                       |                                   |                                   |
| 3                                | 3447 14.1.3.1 | ND              | NA              | ND              | NA              | 27.82              | 0.21                  | NA                                | NA                                |
| 6                                | 3473 14.1.3.1 | 35.46           | 0.49            | ND              | NA              | 26.32              | 0.40                  | <10                               | NA                                |
| 9                                | 3511 14.1.3.1 | ND              | NA              | ND              | NA              | 26.44              | 0.13                  | NA                                | NA                                |
| 1F - Control main                |               |                 |                 |                 |                 |                    |                       |                                   |                                   |
| 12                               | 3470 14.1.3.1 | 35.56           | 0.49            | ND              | NA              | 25.94              | 0.07                  | <10                               | NA                                |
| 15                               | 3395 14.1.3.1 | ND              | NA              | ND              | NA              | 28.32              | 0.01                  | NA                                | NA                                |
| 18                               | 3489 14.1.3.1 | ND              | NA              | ND              | NA              | 27.57              | 0.19                  | NA                                | NA                                |
| 3M - High dose main              |               |                 |                 |                 |                 |                    |                       |                                   |                                   |
| 21                               | 3485 14.1.3.1 | 36.17           | 0.06            | ND              | NA              | 28.97              | 0.36                  | NA                                | NA                                |
| 24                               | 3486 14.1.3.1 | ND              | NA              | ND              | NA              | 28.12              | 0.04                  | NA                                | NA                                |
| 27                               | 3531 14.1.3.1 | 34.07           | 0.06            | 40.09           | 1.06            | 29.29              | 0.08                  | 25.90                             | NA                                |
| 3F - High dose main              |               |                 |                 |                 |                 |                    |                       |                                   |                                   |
| 30                               | 3483 14.1.2.1 | ND              | NA              | ND              | NA              | 30.16              | 0.21                  | NA                                | NA                                |
| 33                               | 3490 14.1.3.1 | ND              | NA              | ND              | NA              | 30.06              | 0.58                  | NA                                | NA                                |
| 36                               | 3379 14.1.3.1 | ND              | NA              | ND              | NA              | 27.90              | 0.07                  | NA                                | NA                                |

| <b>Spleen</b>              |                 | N (Ct - Av.) | N (Ct - STD) | S (Ct - Av.) | S (Ct - STD) | HPRT (Ct - Av.) | HPRT (Ct - STD) | Vaccine amount (PFU) - N | Vaccine amount (PFU) - S |
|----------------------------|-----------------|--------------|--------------|--------------|--------------|-----------------|-----------------|--------------------------|--------------------------|
| #                          | Sample          |              |              |              |              |                 |                 |                          |                          |
| <b>1M - Control main</b>   |                 |              |              |              |              |                 |                 |                          |                          |
| <b>2</b>                   | <b>3447 5.1</b> | ND           | NA           | ND           | NA           | 26.89           | 0.22            | NA                       | NA                       |
| <b>6</b>                   | <b>3473 5.1</b> | ND           | NA           | ND           | NA           | 23.45           | 0.00            | NA                       | NA                       |
| <b>10</b>                  | <b>3511 5.1</b> | ND           | NA           | ND           | NA           | 28.03           | 0.23            | NA                       | NA                       |
| <b>1F - Control main</b>   |                 |              |              |              |              |                 |                 |                          |                          |
| <b>21</b>                  | <b>3470 5.1</b> | ND           | NA           | ND           | NA           | 30.11           | 0.12            | NA                       | NA                       |
| <b>24</b>                  | <b>3395 5.1</b> | ND           | NA           | ND           | NA           | 26.75           | 0.54            | NA                       | NA                       |
| <b>17</b>                  | <b>3489 5.1</b> | ND           | NA           | ND           | NA           | 27.18           | 0.02            | NA                       | NA                       |
| <b>3M - High dose main</b> |                 |              |              |              |              |                 |                 |                          |                          |
| <b>19</b>                  | <b>3485 5.1</b> | ND           | NA           | ND           | NA           | 27.83           | 0.10            | NA                       | NA                       |
| <b>13</b>                  | <b>3486 5.1</b> | ND           | NA           | ND           | NA           | 28.49           | 0.13            | NA                       | NA                       |
| <b>15</b>                  | <b>3531 5.1</b> | ND           | NA           | ND           | NA           | 27.65           | 0.21            | NA                       | NA                       |
| <b>3F - High dose main</b> |                 |              |              |              |              |                 |                 |                          |                          |
| <b>36</b>                  | <b>3483 5.1</b> | ND           | NA           | ND           | NA           | 27.40           | 0.46            | NA                       | NA                       |
| <b>35</b>                  | <b>3490 5.1</b> | ND           | NA           | ND           | NA           | 29.25           | 0.05            | NA                       | NA                       |
| <b>34</b>                  | <b>3379 5.1</b> | ND           | NA           | ND           | NA           | 27.03           | 0.27            | NA                       | NA                       |

| Mesenteric lymph node      |          | N (Ct - Av.) | N (Ct - STD) | S (Ct - Av.) | S (Ct - STD) | HPRT (Ct - Av.) | HPRT (Ct - STD) | Vaccine amount (PFU) - N | Vaccine amount (PFU) - S |
|----------------------------|----------|--------------|--------------|--------------|--------------|-----------------|-----------------|--------------------------|--------------------------|
| #                          | Sample   |              |              |              |              |                 |                 |                          |                          |
| <b>1M - Control main</b>   |          |              |              |              |              |                 |                 |                          |                          |
| 3                          | 3447 7.1 | ND           | NA           | ND           | NA           | 25.89           | 0.04            | NA                       | NA                       |
| 7                          | 3473 7.1 | ND           | NA           | ND           | NA           | 29.96           | 0.01            | NA                       | NA                       |
| 11                         | 3511 7.1 | ND           | NA           | ND           | NA           | 24.17           | 0.12            | NA                       | NA                       |
| <b>1F - Control main</b>   |          |              |              |              |              |                 |                 |                          |                          |
| 22                         | 3470 7.1 | ND           | NA           | ND           | NA           | 26.33           | 0.08            | NA                       | NA                       |
| 23                         | 3395 7.1 | ND           | NA           | ND           | NA           | 26.52           | 0.01            | NA                       | NA                       |
| 18                         | 3489 7.1 | ND           | NA           | ND           | NA           | 27.02           | 0.13            | NA                       | NA                       |
| <b>3M - High dose main</b> |          |              |              |              |              |                 |                 |                          |                          |
| 20                         | 3485 7.1 | ND           | NA           | ND           | NA           | 28.97           | 4.07            | NA                       | NA                       |
| 14                         | 3486 7.1 | ND           | NA           | ND           | NA           | 26.49           | 0.11            | NA                       | NA                       |
| 16                         | 3531 7.1 | ND           | NA           | ND           | NA           | 26.46           | 0.08            | NA                       | NA                       |
| <b>3F - High dose main</b> |          |              |              |              |              |                 |                 |                          |                          |
| 33                         | 3483 7.1 | ND           | NA           | ND           | NA           | 26.01           | 0.49            | NA                       | NA                       |
| 32                         | 3490 7.1 | ND           | NA           | ND           | NA           | 26.05           | 0.15            | NA                       | NA                       |
| 31                         | 3379 7.1 | ND           | NA           | ND           | NA           | 25.57           | 0.13            | NA                       | NA                       |

| <b>Iliac lymph node</b> |                  | <b>N (Ct - Av.)</b> | <b>N (Ct - STD)</b> | <b>S (Ct - Av.)</b> | <b>S (Ct - STD)</b> | <b>HPRT (Ct - Av.)</b> | <b>HPRT (Ct - STD)</b> | <b>Vaccine amount (PFU) - N</b> | <b>Vaccine amount (PFU) - S</b> |
|-------------------------|------------------|---------------------|---------------------|---------------------|---------------------|------------------------|------------------------|---------------------------------|---------------------------------|
| <b>#</b>                | <b>Sample</b>    |                     |                     |                     |                     |                        |                        |                                 |                                 |
| 1M - Control main       |                  |                     |                     |                     |                     |                        |                        |                                 |                                 |
| <b>1</b>                | <b>3447 10.1</b> | ND                  | NA                  | ND                  | NA                  | 27.24                  | 0.04                   | <b>NA</b>                       | <b>NA</b>                       |
| <b>5</b>                | <b>3473 10.1</b> | ND                  | NA                  | ND                  | NA                  | 27.04                  | 0.04                   | <b>NA</b>                       | <b>NA</b>                       |
| <b>9</b>                | <b>3511 10.1</b> | ND                  | NA                  | ND                  | NA                  | 26.68                  | 1.67                   | <b>NA</b>                       | <b>NA</b>                       |
| 1F - Control main       |                  |                     |                     |                     |                     |                        |                        |                                 |                                 |
| <b>4</b>                | <b>3470 10.1</b> | ND                  | NA                  | ND                  | NA                  | 26.17                  | 0.01                   | <b>NA</b>                       | <b>NA</b>                       |
| <b>12</b>               | <b>3395 10.1</b> | ND                  | NA                  | ND                  | NA                  | 27.54                  | 0.16                   | <b>NA</b>                       | <b>NA</b>                       |
| <b>8</b>                | <b>3489 10.1</b> | ND                  | NA                  | ND                  | NA                  | 26.76                  | 0.08                   | <b>NA</b>                       | <b>NA</b>                       |
| 3M - High dose main     |                  |                     |                     |                     |                     |                        |                        |                                 |                                 |
| <b>30</b>               | <b>3485 10.1</b> | 28.37               | 0.01                | 33.16               | 0.04                | 26.21                  | 0.08                   | <b>166.48</b>                   | <b>115.27</b>                   |
| <b>29</b>               | <b>3486 10.1</b> | 35.41               | 1.11                | 40.28               | 1.08                | 26.99                  | 0.04                   | <b>&lt;10</b>                   | <b>NA</b>                       |
| <b>28</b>               | <b>3531 10.1</b> | 31.53               | 0.35                | 37.17               | 0.45                | 27.01                  | 0.06                   | <b>30.95</b>                    | <b>11.73</b>                    |
| 3F - High dose main     |                  |                     |                     |                     |                     |                        |                        |                                 |                                 |
| <b>27</b>               | <b>3483 10.1</b> | 30.35               | 0.01                | 35.92               | 0.28                | 26.91                  | 0.21                   | <b>67.08</b>                    | <b>26.57</b>                    |
| <b>26</b>               | <b>3490 10.1</b> | 30.63               | 0.38                | 35.95               | 0.52                | 27.17                  | 0.04                   | <b>66.14</b>                    | <b>31.40</b>                    |
| <b>25</b>               | <b>3379 10.1</b> | 28.10               | 0.49                | 33.58               | 0.57                | 26.32                  | 0.10                   | <b>219.84</b>                   | <b>92.81</b>                    |

| <b>Brain</b>               |                 | N (Ct - Av.) | N (Ct - STD) | S (Ct - Av.) | S (Ct - STD) | HPRT (Ct - Av.) | HPRT (Ct - STD) | Vaccine amount (PFU) - N | Vaccine amount (PFU) - S |
|----------------------------|-----------------|--------------|--------------|--------------|--------------|-----------------|-----------------|--------------------------|--------------------------|
| <b>#</b>                   | <b>Sample</b>   |              |              |              |              |                 |                 |                          |                          |
| <b>1M - Control main</b>   |                 |              |              |              |              |                 |                 |                          |                          |
| <b>6</b>                   | <b>3447 1.1</b> | ND           | NA           | ND           | NA           | 24.66           | 0.22            | NA                       | NA                       |
| <b>5</b>                   | <b>3473 1.1</b> | ND           | NA           | ND           | NA           | 24.35           | 0.01            | NA                       | NA                       |
| <b>12</b>                  | <b>3511 1.1</b> | ND           | NA           | ND           | NA           | 24.72           | 0.45            | NA                       | NA                       |
| <b>1F - Control main</b>   |                 |              |              |              |              |                 |                 |                          |                          |
| <b>11</b>                  | <b>3470 1.1</b> | ND           | NA           | ND           | NA           | 24.94           | 0.04            | NA                       | NA                       |
| <b>10</b>                  | <b>3395 1.1</b> | ND           | NA           | ND           | NA           | 24.43           | 0.28            | NA                       | NA                       |
| <b>9</b>                   | <b>3489 1.1</b> | ND           | NA           | ND           | NA           | 24.83           | 0.05            | NA                       | NA                       |
| <b>3M - High dose main</b> |                 |              |              |              |              |                 |                 |                          |                          |
| <b>4</b>                   | <b>3485 1.1</b> | ND           | NA           | ND           | NA           | 24.73           | 0.43            | NA                       | NA                       |
| <b>3</b>                   | <b>3486 1.1</b> | ND           | NA           | ND           | NA           | 24.23           | 0.06            | NA                       | NA                       |
| <b>2</b>                   | <b>3531 1.1</b> | ND           | NA           | ND           | NA           | 24.94           | 0.13            | NA                       | NA                       |
| <b>3F - High dose main</b> |                 |              |              |              |              |                 |                 |                          |                          |
| <b>1</b>                   | <b>3483 1.1</b> | ND           | NA           | ND           | NA           | 24.76           | 0.08            | NA                       | NA                       |
| <b>8</b>                   | <b>3490 1.1</b> | ND           | NA           | ND           | NA           | 24.72           | 0.11            | NA                       | NA                       |
| <b>7</b>                   | <b>3379 1.1</b> | ND           | NA           | ND           | NA           | 24.18           | 0.21            | NA                       | NA                       |

| <b>Heart</b>               |          | N (Ct - Av.) | N (Ct - STD) | S (Ct - Av.) | S (Ct - STD) | HPRT (Ct - Av.) | HPRT (Ct - STD) | Vaccine amount (PFU) - N | Vaccine amount (PFU) - S |
|----------------------------|----------|--------------|--------------|--------------|--------------|-----------------|-----------------|--------------------------|--------------------------|
| #                          | Sample   |              |              |              |              |                 |                 |                          |                          |
| <b>1M - Control main</b>   |          |              |              |              |              |                 |                 |                          |                          |
| 13                         | 3447 3.1 | ND           | NA           | ND           | NA           | 26.49           | 0.18            | NA                       | NA                       |
| 14                         | 3473 3.1 | ND           | NA           | ND           | NA           | 26.83           | 0.05            | NA                       | NA                       |
| 15                         | 3511 3.1 | ND           | NA           | ND           | NA           | 26.19           | 0.01            | NA                       | NA                       |
| <b>1F - Control main</b>   |          |              |              |              |              |                 |                 |                          |                          |
| 16                         | 3470 3.1 | ND           | NA           | ND           | NA           | 26.55           | 0.20            | NA                       | NA                       |
| 17                         | 3395 3.1 | ND           | NA           | ND           | NA           | 27.43           | 0.28            | NA                       | NA                       |
| 18                         | 3489 3.1 | ND           | NA           | ND           | NA           | 27.26           | 0.04            | NA                       | NA                       |
| <b>3M - High dose main</b> |          |              |              |              |              |                 |                 |                          |                          |
| 19                         | 3485 3.1 | ND           | NA           | ND           | NA           | 27.14           | 0.37            | NA                       | NA                       |
| 20                         | 3486 3.1 | ND           | NA           | ND           | NA           | 26.51           | 0.06            | NA                       | NA                       |
| 21                         | 3531 3.1 | ND           | NA           | ND           | NA           | 26.68           | 0.03            | NA                       | NA                       |
| <b>3F - High dose main</b> |          |              |              |              |              |                 |                 |                          |                          |
| 22                         | 3483 3.1 | ND           | NA           | ND           | NA           | 27.05           | 0.04            | NA                       | NA                       |
| 23                         | 3490 3.1 | ND           | NA           | ND           | NA           | 27.71           | 1.04            | NA                       | NA                       |
| 24                         | 3379 3.1 | ND           | NA           | ND           | NA           | 30.59           | 0.42            | NA                       | NA                       |

| <b>Kidney</b>              |                 | N (Ct - Av.) | N (Ct - STD) | S (Ct - Av.) | S (Ct - STD) | HPRT (Ct - Av.) | HPRT (Ct - STD) | Vaccine amount (PFU) - N | Vaccine amount (PFU) - S |
|----------------------------|-----------------|--------------|--------------|--------------|--------------|-----------------|-----------------|--------------------------|--------------------------|
| <b>#</b>                   | <b>Sample</b>   |              |              |              |              |                 |                 |                          |                          |
| <b>1M - Control main</b>   |                 |              |              |              |              |                 |                 |                          |                          |
| <b>2</b>                   | <b>3447 6.1</b> | ND           | NA           | ND           | NA           | 28.59           | 0.31            | NA                       | NA                       |
| <b>5</b>                   | <b>3473 6.1</b> | ND           | NA           | ND           | NA           | 29.05           | 0.40            | NA                       | NA                       |
| <b>3</b>                   | <b>3511 6.1</b> | ND           | NA           | ND           | NA           | 29.88           | 0.17            | NA                       | NA                       |
| <b>1F - Control main</b>   |                 |              |              |              |              |                 |                 |                          |                          |
| <b>4</b>                   | <b>3470 6.1</b> | ND           | NA           | ND           | NA           | 30.08           | 0.20            | NA                       | NA                       |
| <b>1</b>                   | <b>3395 6.1</b> | ND           | NA           | ND           | NA           | 28.96           | 0.18            | NA                       | NA                       |
| <b>6</b>                   | <b>3489 6.1</b> | ND           | NA           | ND           | NA           | 28.19           | 0.36            | NA                       | NA                       |
| <b>3M - High dose main</b> |                 |              |              |              |              |                 |                 |                          |                          |
| <b>7</b>                   | <b>3485 6.1</b> | ND           | NA           | ND           | NA           | 28.39           | 0.11            | NA                       | NA                       |
| <b>9</b>                   | <b>3486 6.1</b> | ND           | NA           | ND           | NA           | 29.36           | 0.33            | NA                       | NA                       |
| <b>10</b>                  | <b>3531 6.1</b> | ND           | NA           | ND           | NA           | 28.29           | 0.08            | NA                       | NA                       |
| <b>3F - High dose main</b> |                 |              |              |              |              |                 |                 |                          |                          |
| <b>11</b>                  | <b>3483 6.1</b> | ND           | NA           | ND           | NA           | 27.77           | 0.18            | NA                       | NA                       |
| <b>12</b>                  | <b>3490 6.1</b> | ND           | NA           | ND           | NA           | 30.09           | 0.95            | NA                       | NA                       |
| <b>8</b>                   | <b>3379 6.1</b> | ND           | NA           | ND           | NA           | 28.54           | 0.01            | NA                       | NA                       |

| <b>Liver</b>               |                 | N (Ct - Av.) | N (Ct - STD) | S (Ct - Av.) | S (Ct - STD) | HPRT (Ct - Av.) | HPRT (Ct - STD) | Vaccine amount (PFU) - N | Vaccine amount (PFU) - S |
|----------------------------|-----------------|--------------|--------------|--------------|--------------|-----------------|-----------------|--------------------------|--------------------------|
| <b>#</b>                   | <b>Sample</b>   |              |              |              |              |                 |                 |                          |                          |
| <b>1M - Control main</b>   |                 |              |              |              |              |                 |                 |                          |                          |
| <b>13</b>                  | <b>3447 9.1</b> | ND           | NA           | ND           | NA           | 27.80           | 0.43            | NA                       | NA                       |
| <b>14</b>                  | <b>3473 9.1</b> | ND           | NA           | ND           | NA           | 28.06           | 0.83            | NA                       | NA                       |
| <b>15</b>                  | <b>3511 9.1</b> | ND           | NA           | ND           | NA           | 27.68           | 0.69            | NA                       | NA                       |
| <b>1F - Control main</b>   |                 |              |              |              |              |                 |                 |                          |                          |
| <b>16</b>                  | <b>3470 9.1</b> | ND           | NA           | ND           | NA           | 28.01           | 0.08            | NA                       | NA                       |
| <b>17</b>                  | <b>3395 9.1</b> | ND           | NA           | ND           | NA           | 29.03           | 0.01            | NA                       | NA                       |
| <b>18</b>                  | <b>3489 9.1</b> | ND           | NA           | ND           | NA           | 28.73           | 0.11            | NA                       | NA                       |
| <b>3M - High dose main</b> |                 |              |              |              |              |                 |                 |                          |                          |
| <b>19</b>                  | <b>3485 9.1</b> | ND           | NA           | ND           | NA           | 28.36           | NA              | NA                       | NA                       |
| <b>20</b>                  | <b>3486 9.1</b> | ND           | NA           | ND           | NA           | 28.51           | 0.06            | NA                       | NA                       |
| <b>21</b>                  | <b>3531 9.1</b> | ND           | NA           | ND           | NA           | 27.70           | 0.54            | NA                       | NA                       |
| <b>3F - High dose main</b> |                 |              |              |              |              |                 |                 |                          |                          |
| <b>22</b>                  | <b>3483 9.1</b> | ND           | NA           | ND           | NA           | 28.98           | 0.14            | NA                       | NA                       |
| <b>23</b>                  | <b>3490 9.1</b> | ND           | NA           | ND           | NA           | 28.20           | 0.02            | NA                       | NA                       |
| <b>24</b>                  | <b>3379 9.1</b> | ND           | NA           | ND           | NA           | 28.14           | 0.00            | NA                       | NA                       |



| <b>Thymus</b>              |                 | N (Ct - Av.) | N (Ct - STD) | S (Ct - Av.) | S (Ct - STD) | HPRT (Ct - Av.) | HPRT (Ct - STD) | Vaccine amount (PFU) - N | Vaccine amount (PFU) - S |
|----------------------------|-----------------|--------------|--------------|--------------|--------------|-----------------|-----------------|--------------------------|--------------------------|
| <b>#</b>                   | <b>Sample</b>   |              |              |              |              |                 |                 |                          |                          |
| <b>1M - Control main</b>   |                 |              |              |              |              |                 |                 |                          |                          |
| <b>1</b>                   | <b>3447 2.1</b> | ND           | NA           | ND           | NA           | 27.12           | 0.07            | NA                       | NA                       |
| <b>2</b>                   | <b>3473 2.1</b> | ND           | NA           | ND           | NA           | 27.46           | 0.35            | NA                       | NA                       |
| <b>3</b>                   | <b>3511 2.1</b> | ND           | NA           | ND           | NA           | 27.47           | 0.04            | NA                       | NA                       |
| <b>1F - Control main</b>   |                 |              |              |              |              |                 |                 |                          |                          |
| <b>4</b>                   | <b>3470 2.1</b> | ND           | NA           | ND           | NA           | 27.60           | 0.03            | NA                       | NA                       |
| <b>5</b>                   | <b>3395 2.1</b> | ND           | NA           | ND           | NA           | 27.27           | 0.05            | NA                       | NA                       |
| <b>6</b>                   | <b>3489 2.1</b> | ND           | NA           | ND           | NA           | 27.14           | 0.13            | NA                       | NA                       |
| <b>3M - High dose main</b> |                 |              |              |              |              |                 |                 |                          |                          |
| <b>7</b>                   | <b>3485 2.1</b> | ND           | NA           | ND           | NA           | 27.36           | 0.04            | NA                       | NA                       |
| <b>8</b>                   | <b>3486 2.1</b> | ND           | NA           | ND           | NA           | 27.97           | 0.64            | NA                       | NA                       |
| <b>9</b>                   | <b>3531 2.1</b> | ND           | NA           | ND           | NA           | 27.68           | 0.80            | NA                       | NA                       |
| <b>3F - High dose main</b> |                 |              |              |              |              |                 |                 |                          |                          |
| <b>10</b>                  | <b>3483 2.1</b> | ND           | NA           | ND           | NA           | 26.55           | 0.73            | NA                       | NA                       |
| <b>11*</b>                 | <b>3490 2.1</b> | ND           | NA           | ND           | NA           | ND              | NA              | NA                       | NA                       |
| <b>12</b>                  | <b>3379 2.1</b> | ND           | NA           | ND           | NA           | 27.77           | 0.62            | NA                       | NA                       |

| Testis/Ovary               |          | N (Ct - Av.) | N (Ct - STD) | S (Ct - Av.) | S (Ct - STD) | HPRT (Ct - Av.) | HPRT (Ct - STD) | Vaccine amount (PFU) - N | Vaccine amount (PFU) - S |
|----------------------------|----------|--------------|--------------|--------------|--------------|-----------------|-----------------|--------------------------|--------------------------|
| #                          | Sample   |              |              |              |              |                 |                 |                          |                          |
| <b>1M - Control main</b>   |          |              |              |              |              |                 |                 |                          |                          |
| 13                         | 3447 8.1 | ND           | NA           | ND           | NA           | 26.18           | 0.70            | NA                       | NA                       |
| 14                         | 3473 8.1 | ND           | NA           | ND           | NA           | 26.47           | 0.65            | NA                       | NA                       |
| 15                         | 3511 8.1 | ND           | NA           | ND           | NA           | 26.42           | 0.62            | NA                       | NA                       |
| <b>1F - Control main</b>   |          |              |              |              |              |                 |                 |                          |                          |
| 16                         | 3470 8.1 | ND           | NA           | ND           | NA           | 27.84           | 0.59            | NA                       | NA                       |
| 17                         | 3395 8.1 | ND           | NA           | ND           | NA           | 28.03           | 0.04            | NA                       | NA                       |
| 18                         | 3489 8.1 | ND           | NA           | ND           | NA           | 28.11           | 0.03            | NA                       | NA                       |
| <b>3M - High dose main</b> |          |              |              |              |              |                 |                 |                          |                          |
| 19                         | 3485 8.1 | ND           | NA           | ND           | NA           | 26.08           | 0.13            | NA                       | NA                       |
| 20                         | 3486 8.1 | ND           | NA           | ND           | NA           | 26.40           | 0.08            | NA                       | NA                       |
| 21                         | 3531 8.1 | ND           | NA           | ND           | NA           | 25.99           | 0.07            | NA                       | NA                       |
| <b>3F - High dose main</b> |          |              |              |              |              |                 |                 |                          |                          |
| 22                         | 3483 8.1 | ND           | NA           | ND           | NA           | 27.43           | 0.39            | NA                       | NA                       |
| 23                         | 3490 8.1 | ND           | NA           | ND           | NA           | 27.53           | 0.10            | NA                       | NA                       |
| 24                         | 3379 8.1 | ND           | NA           | ND           | NA           | 27.84           | 0.19            | NA                       | NA                       |

| <b>Bone marrow from the femur</b> |                  | <b>N (Ct - Av.)</b> | <b>N (Ct - STD)</b> | <b>S (Ct - Av.)</b> | <b>S (Ct - STD)</b> | <b>HPRT (Ct - Av.)</b> | <b>HPRT (Ct - STD)</b> | <b>Vaccine amount (PFU) - N</b> | <b>Vaccine amount (PFU) - S</b> |
|-----------------------------------|------------------|---------------------|---------------------|---------------------|---------------------|------------------------|------------------------|---------------------------------|---------------------------------|
| <b>#</b>                          | <b>Sample</b>    |                     |                     |                     |                     |                        |                        |                                 |                                 |
| 1M - Control main                 |                  |                     |                     |                     |                     |                        |                        |                                 |                                 |
| <b>25</b>                         | <b>3447 12.1</b> | ND                  | NA                  | ND                  | NA                  | 30.07                  | 0.01                   | <b>NA</b>                       | <b>NA</b>                       |
| <b>26</b>                         | <b>3473 12.1</b> | ND                  | NA                  | ND                  | NA                  | 28.93                  | 0.22                   | <b>NA</b>                       | <b>NA</b>                       |
| <b>27</b>                         | <b>3511 12.1</b> | ND                  | NA                  | ND                  | NA                  | 28.93                  | 0.16                   | <b>NA</b>                       | <b>NA</b>                       |
| 1F - Control main                 |                  |                     |                     |                     |                     |                        |                        |                                 |                                 |
| <b>28</b>                         | <b>3470 12.1</b> | ND                  | NA                  | ND                  | NA                  | 29.96                  | 0.18                   | <b>NA</b>                       | <b>NA</b>                       |
| <b>29</b>                         | <b>3395 12.1</b> | ND                  | NA                  | ND                  | NA                  | 28.87                  | 0.59                   | <b>NA</b>                       | <b>NA</b>                       |
| <b>30</b>                         | <b>3489 12.1</b> | ND                  | NA                  | ND                  | NA                  | 29.48                  | 0.06                   | <b>NA</b>                       | <b>NA</b>                       |
| 3M - High dose main               |                  |                     |                     |                     |                     |                        |                        |                                 |                                 |
| <b>31</b>                         | <b>3485 12.1</b> | ND                  | NA                  | ND                  | NA                  | 29.29                  | 0.13                   | <b>NA</b>                       | <b>NA</b>                       |
| <b>32</b>                         | <b>3486 12.1</b> | ND                  | NA                  | ND                  | NA                  | 29.68                  | 0.01                   | <b>NA</b>                       | <b>NA</b>                       |
| <b>33</b>                         | <b>3531 12.1</b> | ND                  | NA                  | ND                  | NA                  | 31.47                  | 0.83                   | <b>NA</b>                       | <b>NA</b>                       |
| 3F - High dose main               |                  |                     |                     |                     |                     |                        |                        |                                 |                                 |
| <b>34</b>                         | <b>3483 12.1</b> | ND                  | NA                  | ND                  | NA                  | 29.15                  | 0.02                   | <b>NA</b>                       | <b>NA</b>                       |
| <b>35</b>                         | <b>3490 12.1</b> | ND                  | NA                  | ND                  | NA                  | 28.46                  | 0.12                   | <b>NA</b>                       | <b>NA</b>                       |
| <b>36</b>                         | <b>3379 12.1</b> | ND                  | NA                  | ND                  | NA                  | 30.36                  | 0.05                   | <b>NA</b>                       | <b>NA</b>                       |

| Iliac lymph node               |                  | N (Ct - Av.) | N (Ct - STD) | S (Ct - Av.) | S (Ct - STD) | HPRT (Ct - Av.) | HPRT (Ct - STD) | Vaccine amount (PFU) - N | Vaccine amount (PFU) - S |
|--------------------------------|------------------|--------------|--------------|--------------|--------------|-----------------|-----------------|--------------------------|--------------------------|
| #                              | Sample           |              |              |              |              |                 |                 |                          |                          |
| <b>1M - Control recovery</b>   |                  |              |              |              |              |                 |                 |                          |                          |
| <b>1</b>                       | <b>3453.10.1</b> | ND           | NA           | ND           | NA           | 26.92           | 0.40            | <b>NA</b>                | <b>NA</b>                |
| <b>5</b>                       | <b>3464.10.1</b> | ND           | NA           | ND           | NA           | 26.24           | 0.47            | <b>NA</b>                | <b>NA</b>                |
| <b>9</b>                       | <b>3498.10.1</b> | ND           | NA           | ND           | NA           | 26.05           | 0.01            | <b>NA</b>                | <b>NA</b>                |
| <b>1F - Control recovery</b>   |                  |              |              |              |              |                 |                 |                          |                          |
| <b>2</b>                       | <b>3418.10.1</b> | ND           | NA           | ND           | NA           | 26.55           | 0.63            | <b>NA</b>                | <b>NA</b>                |
| <b>6</b>                       | <b>3400.10.1</b> | ND           | NA           | ND           | NA           | 26.36           | 0.48            | <b>NA</b>                | <b>NA</b>                |
| <b>10</b>                      | <b>3414.10.1</b> | ND           | NA           | ND           | NA           | 26.80           | 0.15            | <b>NA</b>                | <b>NA</b>                |
| <b>3M - High dose recovery</b> |                  |              |              |              |              |                 |                 |                          |                          |
| <b>3</b>                       | <b>3446.10.1</b> | 34.60        | 0.18         | 41.57        | 0.49         | 25.21           | 0.26            | <b>&lt;10</b>            | <b>&lt;10</b>            |
| <b>7</b>                       | <b>3426.10.1</b> | ND           | NA           | ND           | NA           | 26.29           | 0.37            | <b>NA</b>                | <b>NA</b>                |
| <b>11</b>                      | <b>3519.10.1</b> | 28.44        | 0.02         | 34.59        | 0.33         | 25.30           | 0.02            | <b>83.08</b>             | <b>21.78</b>             |
| <b>3F - High dose recovery</b> |                  |              |              |              |              |                 |                 |                          |                          |
| <b>4</b>                       | <b>3406.10.1</b> | 33.14        | 0.54         | 39.47        | 0.22         | 25.13           | 0.40            | <b>&lt;10</b>            | <b>&lt;10</b>            |
| <b>8</b>                       | <b>3408.10.1</b> | 30.49        | 0.06         | 36.64        | 0.45         | 25.29           | 0.57            | <b>19.06</b>             | <b>&lt;10</b>            |
| <b>12</b>                      | <b>3433.10.1</b> | 33.27        | 1.15         | 40.16        | 2.17         | 26.23           | 0.01            | <b>&lt;10</b>            | <b>&lt;10</b>            |

The Ct is a relative measure of the concentration of target in the PCR reaction (low Cp = high concentration); Av = Average; NA = Not Applicable; ND = Not Detected; STD = Standard Deviation; Average and Standard Deviation values of duplicates performed;

\* HPRT not detected; \*\* Low RNA extraction yield; \*\*\* 35.64 for one replicate and not detected in the other replicate in 1st run; 34.22 for one replicate and not detected in the other replicate in 2nd run.

For "S" - Samples not detected for both qPCR replicates, and samples with Ct > 39.0 in one replicate and not detected in the second replicate are marked as ND.

For "N" - Samples not detected for both qPCR replicates, and samples with Ct > 35.9 in one replicate and not detected in the second replicate are marked as ND.

Vaccine amount calculations were performed for samples with average N Ct < 36 and/or average S Ct < 40, using the following equations:

- Equation for N:  $\text{Log(PFU)} = ((\text{Ct-N minus Ct-HPRT}) - 9.34)/(-3.23)$
- Equation for S:  $\text{Log(PFU)} = ((\text{Ct-S minus Ct-HPRT}) - 13.63)/(-3.24)$
